# Supplementary material for: FCGR2C Polymorphisms Associated with HIV-1 Vaccine Protection Are Linked to Altered Gene Expression of Fc-γ Receptors in Human B Cells
Source: PubMed Central journal article supplement (PMC4807760; doi:10.1371/journal.pone.0152425), 2016-03-25

# Supplemental Figure 3

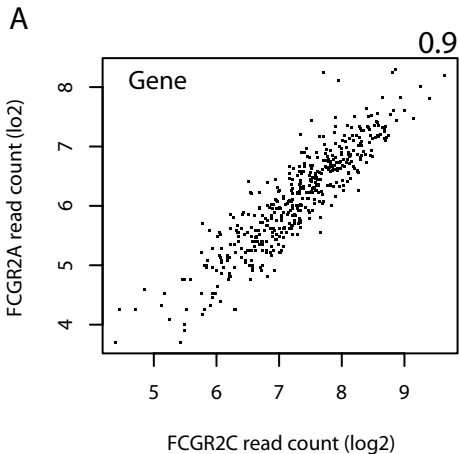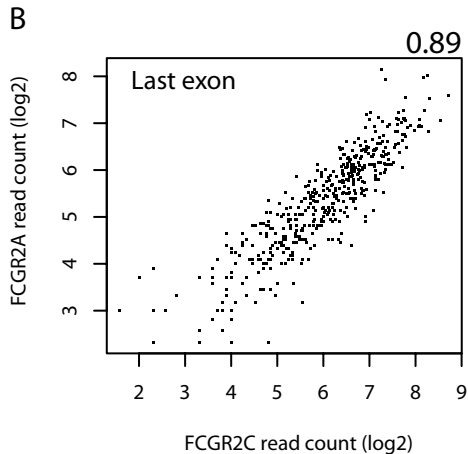

Supplement: pone.0152425.s003.pdf [file pone.0152425.s003.pdf]
